# Supplementary material for: Multiwalled Carbon Nanotubes Induce Fibrosis and Telomere Length Alterations
Source: MDPI journal article supplement (doi:10.3390/ijms23116005), 2022-05-26
Supplement: s1 [file s1]

## Supplementary file 1: Tables

**Table S1.** Fold changes of gene expression in pleura and lung of mice exposed to Mitsui-7 (Mit-7) or NM-401. Statistical analysis was performed in R using means of linear regression, adjusted for total exposure time and sex ( $n = 19$ ). High dose (HD), low dose (LD).

| Pleura        |          |       |          |          |       |          |           |       |          |           |       |          |
|---------------|----------|-------|----------|----------|-------|----------|-----------|-------|----------|-----------|-------|----------|
|               | Mit-7 LD |       |          | Mit-7 HD |       |          | NM-401 LD |       |          | NM-401 HD |       |          |
|               | Mean     | SD    | p-value  | Mean     | SD    | p-value  | Mean      | SD    | p-value  | Mean      | SD    | p-value  |
| <i>Bcl-2</i>  | 0.339    | 0.079 | 5.50E-04 | 0.422    | 0.099 | 8.00E-03 | 0.541     | 0.122 | 3.60E-02 | 0.809     | 0.185 | 4.30E-01 |
| <i>Ccl11</i>  | 0.859    | 0.102 | 3.20E-01 | 0.717    | 0.090 | 5.00E-02 | 1.024     | 0.132 | 9.70E-01 | 0.983     | 0.122 | 8.40E-01 |
| <i>Ccl12</i>  | 5.787    | 0.990 | 3.40E-10 | 18.238   | 3.481 | 5.10E-17 | 10.765    | 1.654 | 4.70E-16 | 17.354    | 2.996 | 6.50E-18 |
| <i>Ccl3</i>   | 4.582    | 0.864 | 3.10E-07 | 5.828    | 1.029 | 3.50E-09 | 4.819     | 0.745 | 4.80E-09 | 10.448    | 1.836 | 2.60E-13 |
| <i>Cdh1</i>   | 1.013    | 0.264 | 9.10E-01 | 0.994    | 0.273 | 8.70E-01 | 0.853     | 0.190 | 5.30E-01 | 1.216     | 0.288 | 6.70E-01 |
| <i>Col1a2</i> | 0.544    | 0.228 | 1.70E-01 | 1.265    | 0.502 | 8.40E-01 | 3.352     | 1.299 | 3.20E-02 | 1.771     | 0.602 | 3.40E-01 |
| <i>Cxcl2</i>  | 3.646    | 0.718 | 9.30E-06 | 5.700    | 1.042 | 5.30E-09 | 5.105     | 0.799 | 1.60E-09 | 6.990     | 1.228 | 1.00E-10 |
| <i>Il1a</i>   | 1.285    | 0.327 | 6.40E-01 | 1.202    | 0.324 | 8.00E-01 | 2.124     | 0.486 | 4.60E-02 | 1.521     | 0.366 | 3.40E-01 |
| <i>Il1b</i>   | 1.673    | 0.595 | 3.80E-01 | 1.635    | 0.635 | 4.50E-01 | 2.890     | 0.840 | 2.70E-02 | 3.523     | 1.118 | 1.40E-02 |
| <i>Mmp13</i>  | 0.940    | 0.210 | 6.20E-01 | 1.462    | 0.381 | 4.50E-01 | 1.637     | 0.349 | 2.10E-01 | 3.230     | 0.763 | 2.50E-03 |
| <i>Mmp2</i>   | 1.124    | 0.124 | 4.80E-01 | 2.168    | 0.263 | 1.30E-05 | 1.967     | 0.202 | 1.60E-05 | 2.026     | 0.212 | 1.60E-05 |
| <i>Mmp8</i>   | 2.986    | 0.592 | 7.90E-04 | 2.943    | 0.669 | 2.40E-03 | 3.071     | 0.581 | 3.30E-04 | 2.956     | 0.558 | 7.60E-04 |
| <i>Mmp9</i>   | 1.071    | 0.304 | 9.20E-01 | 0.651    | 0.196 | 1.80E-01 | 1.364     | 0.379 | 5.80E-01 | 1.158     | 0.296 | 8.90E-01 |
| <i>Timp1</i>  | 5.755    | 2.208 | 2.30E-03 | 8.203    | 3.191 | 3.40E-04 | 8.593     | 3.023 | 6.60E-05 | 14.397    | 4.521 | 1.00E-06 |
| <i>Timp4</i>  | 0.154    | 0.069 | 7.90E-04 | 0.278    | 0.153 | 2.40E-02 | 0.329     | 0.119 | 1.80E-02 | 0.271     | 0.107 | 9.80E-03 |
| Lung          |          |       |          |          |       |          |           |       |          |           |       |          |
|               | Mit-7 LD |       |          | Mit-7 HD |       |          | NM-401 LD |       |          | NM-401 HD |       |          |
|               | Mean     | SD    | p-value  | Mean     | SD    | p-value  | Mean      | SD    | p-value  | Mean      | SD    | p-value  |
| <i>Bcl-2</i>  | 0.627    | 0.045 | 1.10E-05 | 0.870    | 0.066 | 1.80E-01 | 0.712     | 0.050 | 6.30E-04 | 0.835     | 0.056 | 6.50E-02 |
| <i>Ccl11</i>  | 2.894    | 0.390 | 3.80E-05 | 2.419    | 0.298 | 5.90E-04 | 2.302     | 0.235 | 3.40E-04 | 2.344     | 0.263 | 6.90E-04 |
| <i>Ccl12</i>  | 2.122    | 0.338 | 1.20E-03 | 4.122    | 0.694 | 4.30E-08 | 2.447     | 0.367 | 6.70E-05 | 3.191     | 0.474 | 7.70E-07 |
| <i>Ccl3</i>   | 1.670    | 0.214 | 4.00E-02 | 1.782    | 0.262 | 2.70E-02 | 1.160     | 0.131 | 1.00E+00 | 1.786     | 0.203 | 1.00E-02 |
| <i>Cdh1</i>   | 0.997    | 0.066 | 3.00E-01 | 0.961    | 0.066 | 1.60E-01 | 0.859     | 0.051 | 4.80E-03 | 0.917     | 0.056 | 4.70E-02 |
| <i>Cdkn2a</i> | 3.838    | 0.660 | 3.00E-06 | 4.064    | 0.698 | 1.10E-06 | 4.007     | 0.574 | 1.10E-07 | 4.632     | 0.767 | 8.50E-08 |
| <i>Col1a2</i> | 3.522    | 0.426 | 3.70E-11 | 5.779    | 0.744 | 1.20E-15 | 4.482     | 0.514 | 6.70E-15 | 6.012     | 0.658 | 6.00E-18 |
| <i>Cxcl2</i>  | 2.065    | 0.284 | 3.50E-04 | 2.104    | 0.280 | 2.20E-04 | 1.489     | 0.174 | 2.80E-02 | 2.273     | 0.285 | 3.50E-05 |
| <i>Il10</i>   | 4.508    | 0.936 | 8.30E-05 | 3.913    | 0.737 | 2.00E-04 | 4.294     | 0.803 | 6.50E-05 | 3.521     | 0.669 | 5.90E-04 |
| <i>Il1a</i>   | 0.448    | 0.052 | 4.60E-06 | 0.515    | 0.063 | 1.90E-04 | 0.588     | 0.065 | 1.00E-03 | 0.413     | 0.045 | 3.40E-07 |
| <i>Il1b</i>   | 1.061    | 0.178 | 9.70E-01 | 2.356    | 0.427 | 1.50E-03 | 1.327     | 0.210 | 3.20E-01 | 1.653     | 0.262 | 5.40E-02 |
| <i>Mmp13</i>  | 0.987    | 0.148 | 8.80E-01 | 1.847    | 0.259 | 1.30E-03 | 0.596     | 0.084 | 1.40E-02 | 1.231     | 0.154 | 1.70E-01 |
| <i>Mmp2</i>   | 2.110    | 0.155 | 1.70E-06 | 3.115    | 0.246 | 2.30E-12 | 2.423     | 0.174 | 3.40E-09 | 2.672     | 0.200 | 4.00E-10 |
| <i>Mmp8</i>   | 1.807    | 0.347 | 3.80E-02 | 2.135    | 0.449 | 1.20E-02 | 1.571     | 0.267 | 8.50E-02 | 2.011     | 0.355 | 1.20E-02 |
| <i>Mmp9</i>   | 0.952    | 0.140 | 7.80E-01 | 1.623    | 0.251 | 2.80E-02 | 1.140     | 0.164 | 5.40E-01 | 1.462     | 0.202 | 6.40E-02 |
| <i>Timp1</i>  | 3.023    | 0.500 | 7.10E-06 | 4.455    | 0.721 | 5.80E-09 | 3.800     | 0.554 | 1.10E-08 | 3.666     | 0.528 | 3.80E-08 |
| <i>Timp4</i>  | 1.101    | 0.135 | 6.60E-01 | 1.253    | 0.162 | 2.50E-01 | 1.237     | 0.143 | 2.30E-01 | 1.069     | 0.123 | 7.80E-01 |

**Table S2.** Fold change values of exposed HBEC-3KT cells. Complete list of gene expression presented as mean of fold change of exposed cells after 4 (W4), 8 (W8) and 13 (W13) weeks of exposure to NM-401 nanomaterials to the controls ( $n = 2$ ). High dose (HD), low dose (LD).

|        | W4_LD    |         | W4_HD    |         | W8_LD    |         | W8_HD    |         | W13_LD  |        | W13_HD  |        |
|--------|----------|---------|----------|---------|----------|---------|----------|---------|---------|--------|---------|--------|
|        | Mean     | SD      | Mean     | SD      | Mean     | SD      | Mean     | SD      | Mean    | SD     | Mean    | SD     |
| CASP3  | 1.656    | 0.025   | 1.796    | 0.256   | 1.640    | 0.084   | 1.816    | 0.069   | 1.223   | 0.025  | 1.256   | 0.074  |
| CYCS   | 0.564    | 0.020   | 0.670    | 0.179   | 0.367    | 0.092   | 0.426    | 0.082   | 0.352   | 0.055  | 0.322   | 0.013  |
| DIABLO | 1.213    | 0.030   | 1.261    | 0.022   | 1.315    | 0.024   | 1.549    | 0.066   | 0.903   | 0.050  | 0.969   | 0.010  |
| FADD   | 1.202    | 0.420   | 1.252    | 0.246   | 1.196    | 0.233   | 1.198    | 0.097   | 0.872   | 0.428  | 0.780   | 0.279  |
| FAS    | 1.076    | 0.197   | 1.125    | 0.191   | 1.735    | 0.376   | 2.157    | 0.726   | 1.184   | 0.430  | 1.273   | 0.248  |
| DRAM1  | 9.516    | 1.356   | 12.001   | 1.109   | 8.968    | 2.483   | 12.486   | 2.092   | 5.183   | 1.011  | 5.127   | 0.254  |
| BCL-2  | 1.229    | 0.246   | 1.341    | 0.551   | 1.114    | 0.130   | 1.509    | 0.243   | 0.755   | 0.053  | 0.677   | 0.100  |
| AKT1   | 1.864    | 0.065   | 1.992    | 0.418   | 1.415    | 0.104   | 1.427    | 0.172   | 1.280   | 0.041  | 1.149   | 0.123  |
| NPC1   | 2.130    | 0.031   | 2.549    | 0.279   | 1.853    | 0.041   | 1.956    | 0.182   | 1.427   | 0.195  | 1.310   | 0.058  |
| SKI    | 1.352    | 0.096   | 1.449    | 0.158   | 1.140    | 0.145   | 1.222    | 0.233   | 1.123   | 0.112  | 1.052   | 0.153  |
| BAX    | 2.797    | 0.282   | 2.980    | 0.316   | 3.201    | 0.167   | 3.466    | 0.702   | 3.279   | 0.089  | 3.264   | 0.248  |
| ING1   | 1.878    | 0.027   | 2.200    | 0.145   | 1.896    | 0.098   | 2.074    | 0.267   | 1.448   | 0.095  | 1.338   | 0.162  |
| TP53   | 1.945    | 0.155   | 2.090    | 0.646   | 1.391    | 0.109   | 1.360    | 0.092   | 1.270   | 0.034  | 1.092   | 0.039  |
| TNF    | 10.986   | 1.400   | 18.453   | 1.190   | 6.599    | 2.240   | 8.880    | 0.019   | 6.763   | 1.871  | 9.128   | 4.308  |
| MYC    | 0.988    | 0.157   | 1.093    | 0.113   | 1.004    | 0.018   | 1.000    | 0.004   | 0.575   | 0.108  | 0.620   | 0.046  |
| HDAC4  | 1.427    | 0.039   | 1.342    | 0.049   | 1.597    | 0.395   | 1.102    | 0.101   | 0.734   | 0.040  | 0.654   | 0.010  |
| NEK2   | 0.553    | 0.070   | 0.793    | 0.335   | 0.791    | 0.408   | 0.757    | 0.006   | 0.340   | 0.104  | 0.394   | 0.280  |
| CDKN2A | 3.066    | 0.406   | 3.390    | 0.127   | 8.077    | 0.425   | 9.491    | 0.810   | 8.423   | 0.521  | 9.372   | 2.004  |
| CDKN1B | 1.850    | 0.069   | 2.015    | 0.246   | 1.559    | 0.096   | 1.681    | 0.020   | 1.408   | 0.064  | 1.420   | 0.115  |
| CDKN1A | 1.959    | 0.249   | 2.064    | 0.021   | 2.993    | 0.248   | 3.517    | 0.142   | 2.473   | 0.222  | 3.019   | 0.266  |
| ATM    | 1.193    | 0.086   | 1.097    | 0.022   | 0.953    | 0.125   | 1.091    | 0.059   | 1.072   | 0.045  | 0.934   | 0.071  |
| ATR    | 1.564    | 0.049   | 1.498    | 0.035   | 1.195    | 0.025   | 1.236    | 0.054   | 0.779   | 0.078  | 0.791   | 0.043  |
| CHEK1  | 1.706    | 0.051   | 2.129    | 0.740   | 1.462    | 0.016   | 1.693    | 0.312   | 0.912   | 0.035  | 0.790   | 0.018  |
| CHEK2  | 1.430    | 0.104   | 1.558    | 0.402   | 1.617    | 0.119   | 1.666    | 0.024   | 1.033   | 0.087  | 0.920   | 0.064  |
| RAD1   | 1.878    | 0.169   | 2.131    | 0.207   | 1.984    | 0.149   | 2.211    | 0.047   | 0.979   | 0.005  | 1.112   | 0.025  |
| RAD17  | 0.814    | 0.025   | 0.765    | 0.057   | 0.875    | 0.056   | 0.958    | 0.105   | 0.577   | 0.108  | 0.669   | 0.057  |
| DNMT1  | 2.254    | 0.309   | 2.647    | 1.017   | 2.012    | 0.410   | 2.150    | 0.514   | 1.333   | 0.013  | 1.082   | 0.130  |
| DNMT3A | 1.605    | 0.045   | 1.619    | 0.065   | 1.373    | 0.125   | 1.387    | 0.045   | 1.470   | 0.203  | 1.370   | 0.284  |
| DNMT3B | 0.534    | 0.095   | 0.706    | 0.030   | 0.747    | 0.175   | 0.902    | 0.302   | 0.515   | 0.067  | 0.501   | 0.015  |
| ALKBH1 | 1.763    | 0.076   | 2.129    | 0.124   | 1.759    | 0.028   | 2.004    | 0.383   | 1.017   | 0.167  | 1.023   | 0.213  |
| ALKBH5 | 1.472    | 0.083   | 1.543    | 0.278   | 1.095    | 0.014   | 1.176    | 0.278   | 0.894   | 0.003  | 0.814   | 0.016  |
| ERCC2  | 2.409    | 0.016   | 2.883    | 0.749   | 1.489    | 0.272   | 1.426    | 0.290   | 1.593   | 0.039  | 1.280   | 0.018  |
| NEIL3  | 0.989    | 0.140   | 1.579    | 0.958   | 0.732    | 0.138   | 0.701    | 0.246   | 0.401   | 0.056  | 0.317   | 0.109  |
| XPA    | 0.566    | 0.031   | 0.683    | 0.067   | 0.632    | 0.209   | 0.706    | 0.282   | 0.370   | 0.092  | 0.419   | 0.086  |
| OGG1   | 0.909    | 0.099   | 0.936    | 0.169   | 0.953    | 0.083   | 0.973    | 0.032   | 0.658   | 0.101  | 0.690   | 0.119  |
| STAT6  | 0.848    | 0.081   | 0.837    | 0.042   | 0.845    | 0.034   | 0.904    | 0.003   | 0.740   | 0.073  | 0.834   | 0.133  |
| NFE2L2 | 0.642    | 0.150   | 0.649    | 0.118   | 0.945    | 0.378   | 1.099    | 0.426   | 0.563   | 0.234  | 0.658   | 0.226  |
| CAT    | 0.618    | 0.029   | 0.746    | 0.121   | 0.986    | 0.040   | 1.044    | 0.045   | 0.834   | 0.031  | 0.806   | 0.012  |
| NOX1   | 0.995    | 0.120   | 0.956    | 0.238   | 0.865    | 0.031   | 0.995    | 0.073   | 0.779   | 0.058  | 0.848   | 0.013  |
| SOD2   | 11.641   | 0.548   | 12.359   | 0.710   | 12.690   | 0.160   | 14.439   | 0.960   | 6.459   | 1.533  | 7.002   | 1.085  |
| IL8    | 2430.368 | 118.413 | 4027.346 | 823.579 | 1638.320 | 579.911 | 2255.515 | 374.169 | 172.115 | 23.580 | 183.506 | 51.592 |
| TERC   | 1.189    | 0.548   | 0.952    | 0.179   | 0.291    | 0.020   | 0.270    | 0.044   | 0.296   | 0.030  | 0.316   | 0.058  |

|              |        |       |        |        |        |       |        |       |       |       |        |        |
|--------------|--------|-------|--------|--------|--------|-------|--------|-------|-------|-------|--------|--------|
| <i>TERT</i>  | 5.083  | 2.438 | 3.978  | 0.993  | 5.495  | 0.946 | 4.749  | 0.723 | 7.858 | 1.022 | 4.770  | 0.358  |
| <i>CDH1</i>  | 0.777  | 0.116 | 2.053  | 0.205  | 1.030  | 0.084 | 1.038  | 0.145 | 0.977 | 0.219 | 0.726  | 0.219  |
| <i>CXCL2</i> | 30.350 | 2.254 | 45.743 | 21.130 | 22.427 | 5.791 | 30.354 | 1.655 | 3.002 | 0.214 | 5.999  | 3.023  |
| <i>MMP2</i>  | 1.783  | 0.000 | 10.823 | 3.423  | 2.887  | 0.679 | 4.848  | 4.381 | 6.803 | 3.770 | 10.820 | 6.620  |
| <i>CCL3</i>  | 3.954  | 1.037 | 4.822  | 1.689  | 2.048  | 1.001 | 10.529 | 9.193 | 1.236 | 0.258 | 9.646  | 10.942 |

Supplementary file 1: Figures

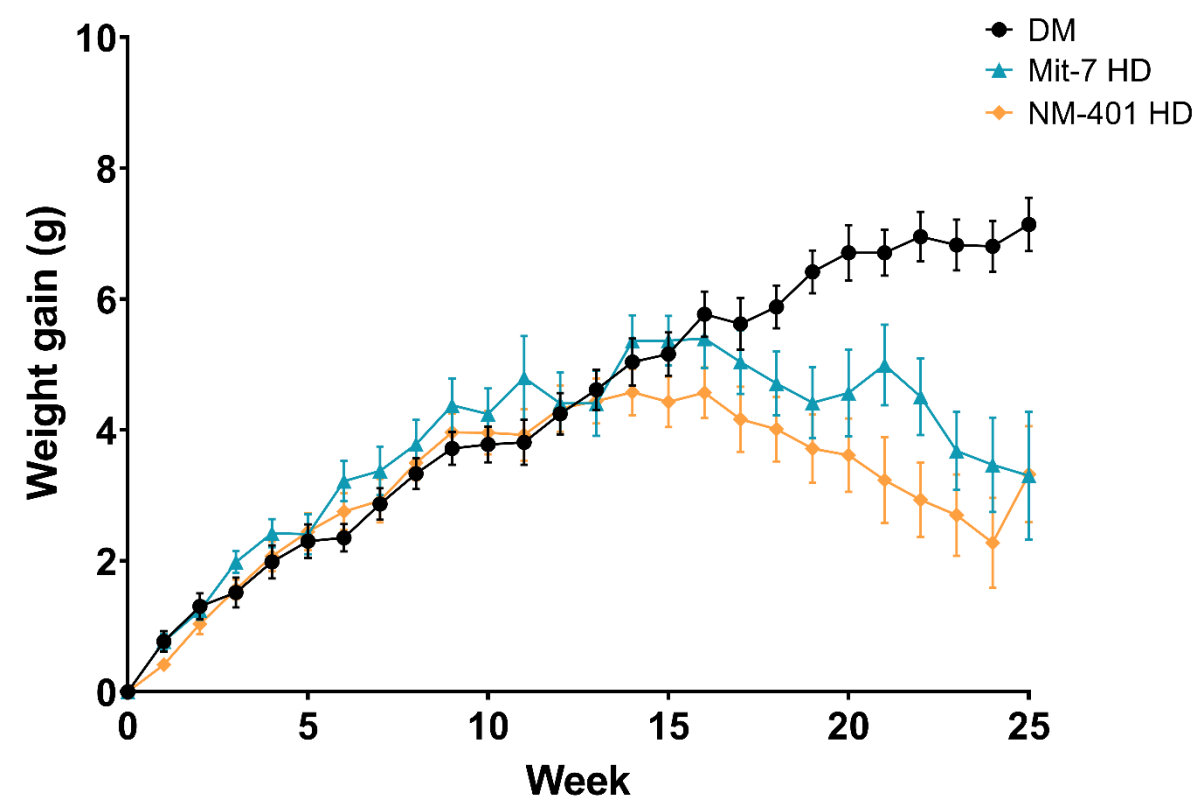

**Figure S1.** Body weight gain of animals after intrapleural injection of MWCNT. Body weight normalized to each animal at time 0. High dose (HD), Mitsui-7 (Mit-7). Values are mean ± SEM (*n* = 19).

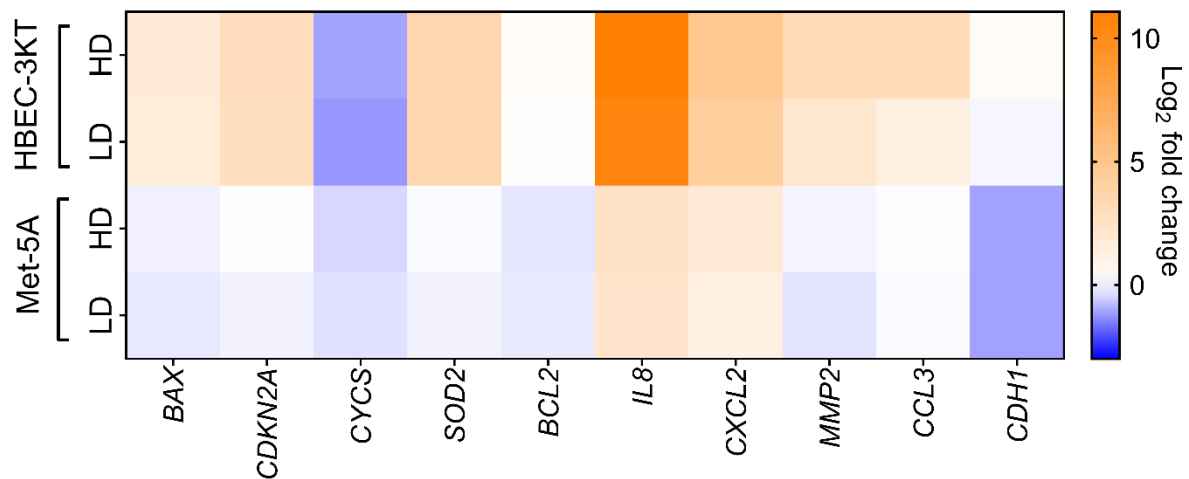

**Figure S2.** Heatmap illustrating selected genes involved in fibrosis and inflammation. Selected genes were run following NM-401 exposure in HBEC-3KT and Met-5A cells. Data presented as mean values of merged data from all weeks for low dose (LD): 0.96  $\mu\text{g}/\text{cm}^2$  and high dose (HD): 1.92  $\mu\text{g}/\text{cm}^2$  ( $n = 6$ ).

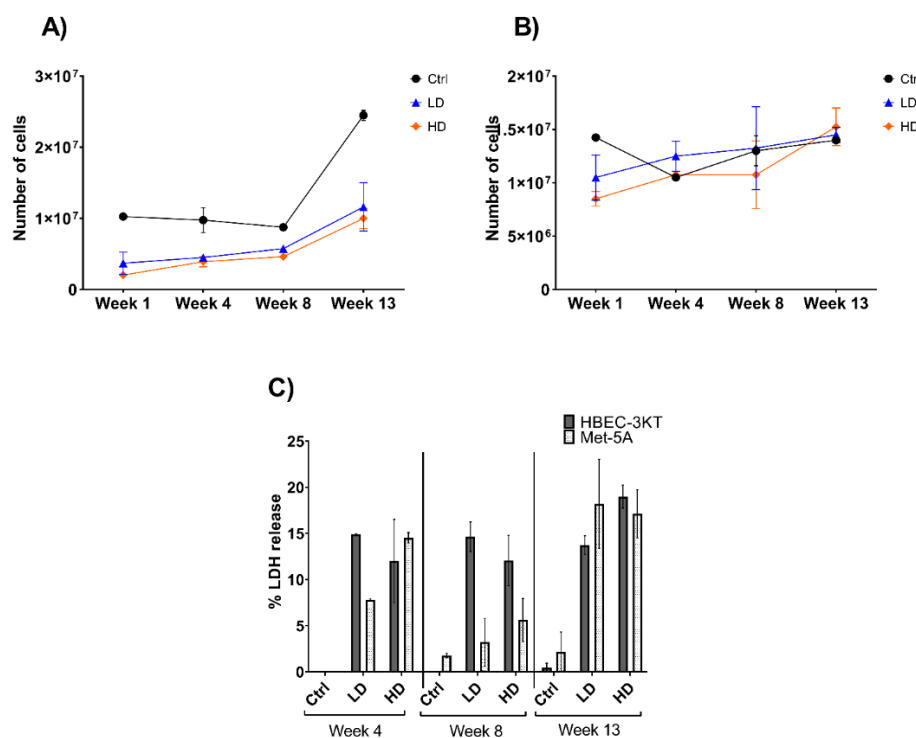

**Figure S3.** Cell proliferation and LDH release of exposed cells to NM-401. Cell count for HBEC-3KT cells (A) and Met-5A cells (B) for control and exposed cells assessed by trypan blue assay presented after 1, 4, 8 and 13 weeks of exposure. c) LDH assay was assessed after 4, 8 and 13 weeks of exposure. Control (Ctrl), low dose (LD): 0.96  $\mu\text{g}/\text{cm}^2$  and high dose (HD): 1.92  $\mu\text{g}/\text{cm}^2$ . Data indicates mean  $\pm$  SEM ( $n = 2$ ).

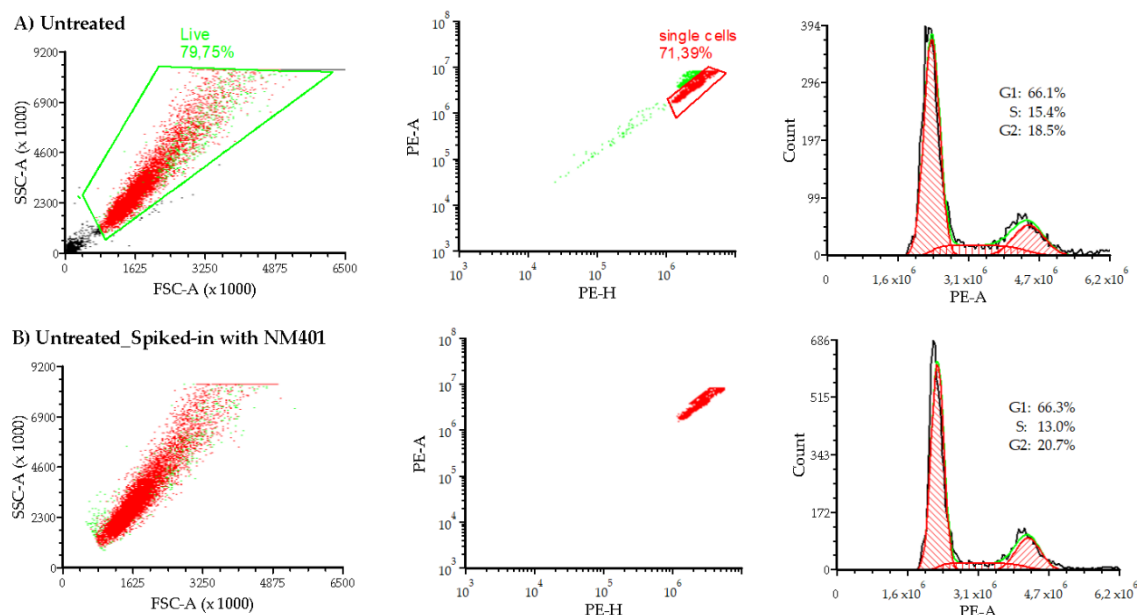

**Figure S4. Assessment NM-401 nanoparticle interference with cell cycle analysis using flow cytometry.** Representative scatter plots and histogram of untreated cells (A) and untreated cells spiked with high-dose of NM-401 (B).

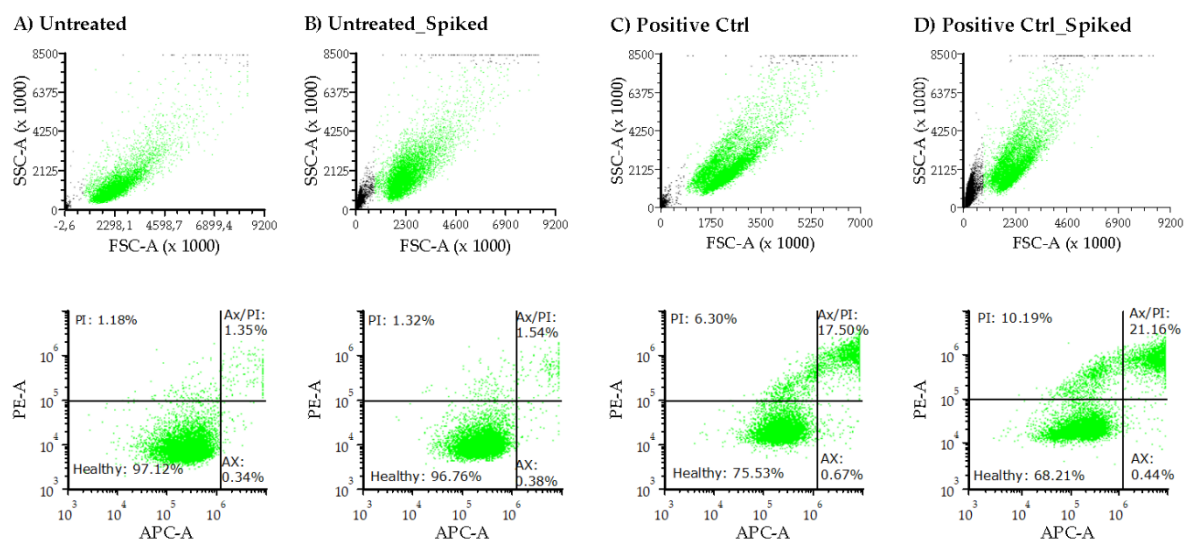

**Figure S5. Assessment NM-401 nanoparticle interference with the analysis of apoptosis by flow cytometry.** Representative scatter plots of untreated cells (A), untreated cells spiked with high-dose of NM-401 (B), positive control (Ctrl) i.e., cells heat shocked at 56°C for 5 min (C) and positive control spiked with high-dose (HD = 1.92  $\mu\text{g}/\text{cm}^2$ ) of NM-401 (D). PI: propidium iodide and AX: Annexin-V.
